# Supplementary material for: Food Safety Knowledge, Attitudes, and Practices of Brazilian Food Truck Food Handlers
Source: MDPI journal article supplement (doi:10.3390/nu11081784), 2019-08-02
Supplement: s1 [file s1]

## FOOD TRUCK FOOD HANDLER QUESTIONNAIRE

|                          |                  |
|--------------------------|------------------|
| <b>Number:</b>           | <b>Year:</b>     |
| <b>Food Truck/Owner:</b> |                  |
| <b>Food Handler:</b>     |                  |
| <b>Health License:</b>   |                  |
| <b>Email/Phone:</b>      |                  |
| <b>City/State:</b>       | <b>Zip Code:</b> |

| SOCIO-DEMOGRAPHIC STATUS                                                                          |
|---------------------------------------------------------------------------------------------------|
| <b>1. Gender</b>                                                                                  |
| 1. Male<br>2. Female                                                                              |
| <b>2. Age</b>                                                                                     |
| 1. ≤25<br>2. 26-40<br>3. >40                                                                      |
| <b>3. Marital status</b>                                                                          |
| 1. With Companion (Married or Stable Union)<br>2. Without Companion (Single/Divorced/Widowed)     |
| <b>4. Children</b>                                                                                |
| 1. Yes<br>2. No                                                                                   |
| <b>5. Monthly income (minimum wage; US\$)</b>                                                     |
| 1. <1 (US\$ 249.5)<br>2. 1-2 (US\$ 249.5 - 499)<br>3. >2-4 (>US\$ 499 – 998)<br>4. >4 (>US\$ 998) |
| <b>6. Level of education</b>                                                                      |
| 1. Primary (Elementary School)<br>2. Secondary (High School)<br>3. Tertiary (Graduate)            |
| <b>7. Previous Experience in Food Services</b>                                                    |
| 1. Yes<br>2. No                                                                                   |
| <b>8. Are you related to the owner?</b>                                                           |
| 1. Yes<br>2. No<br>3. I am the owner                                                              |
| <b>9. Food Safety Training</b>                                                                    |

|                                                                                                     |
|-----------------------------------------------------------------------------------------------------|
| 1. Yes<br>2. No                                                                                     |
| <b>10. Have you received training in the last 6 months?</b>                                         |
| 1. Yes<br>2. No                                                                                     |
| <b>11. Do you have periodic medical examination?</b>                                                |
| 1. Yes<br>2. No                                                                                     |
| <b>KNOWLEDGE, ATTITUDES AND SELF-REPORTED PRACTICES QUESTIONNAIRE</b>                               |
| <b>KNOWLEDGE</b>                                                                                    |
| <b>1. Washing hands before work reduces the risk of food contamination.</b>                         |
| 1. True<br>2. False<br>3. Don't know/Don't remember                                                 |
| <b>2. Wearing gloves is a substitute for hand cleansing.</b>                                        |
| 1. True<br>2. False<br>3. Don't know/Don't remember                                                 |
| <b>3. Freezing kills the microbes that may cause deterioration of foods and foodborne diseases.</b> |
| 1. True<br>2. False<br>3. Don't know/Don't remember                                                 |
| <b>4. A healthy food handler may contaminate food with microbes that cause foodborne diseases.</b>  |
| 1. True<br>2. False<br>3. Don't know/Don't remember                                                 |
| <b>5. Food handlers' health status must be periodically checked.</b>                                |
| 1. True<br>2. False<br>3. Don't know/Don't remember                                                 |
| <b>6. Eating food one day past its expiration date poses risk to health.</b>                        |
| 1. True<br>2. False<br>3. Don't know/Don't remember                                                 |
| <b>7. Food that is unfit for consumption always presents color, taste and/or smell changes.</b>     |
| 1. True<br>2. False                                                                                 |

|                                                                                                                                 |
|---------------------------------------------------------------------------------------------------------------------------------|
| 3. Don't know/Don't remember                                                                                                    |
| <b>8. Washing fruit and vegetables under running water and peeling them is enough to make these foods safe for consumption.</b> |
| 1. True<br>2. False<br>3. Don't know/Don't remember                                                                             |
| <b>9. Well cooked food is free from microbes that cause foodborne diseases.</b>                                                 |
| 1. True<br>2. False<br>3. Don't know/Don't remember                                                                             |
| <b>10. Food handlers with cuts or wounds on hands do not need to be kept away from food handling activities.</b>                |
| 1. True<br>2. False<br>3. Don't know/Don't remember                                                                             |
| <b>ATTITUDES</b>                                                                                                                |
| <b>1. Raw and cooked food should be stored separately.</b>                                                                      |
| 1. Disagree.<br>2. Don't know/Don't remember<br>3. Agree.                                                                       |
| <b>2. The use of adornments, accessories or jewelry can contaminate food.</b>                                                   |
| 1. Disagree.<br>2. Don't know/Don't remember<br>3. Agree.                                                                       |
| <b>3. Wearing a cap is an important practice to reduce the risk of food contamination during handling.</b>                      |
| 1. Disagree.<br>2. Don't know/Don't remember<br>3. Agree.                                                                       |
| <b>4. Defrosted food must not be refrozen.</b>                                                                                  |
| 1. Disagree.<br>2. Don't know/Don't remember<br>3. Agree.                                                                       |
| <b>5. Eggs must be washed after purchase before being stored.</b>                                                               |
| 1. Disagree.<br>2. Don't know/Don't remember<br>3. Agree.                                                                       |
| <b>6. Food thawing can be performed in a bowl with or without water in the sink at room temperature.</b>                        |
| 1. Disagree.<br>2. Don't know/Don't remember<br>3. Agree.                                                                       |

|                                                                                                                                                      |
|------------------------------------------------------------------------------------------------------------------------------------------------------|
| <b>7. Food must be cooled at room temperature before being put in the fridge.</b>                                                                    |
| <ul style="list-style-type: none"> <li>1. Disagree.</li> <li>2. Don't know/Don't remember</li> <li>3. Agree.</li> </ul>                              |
| <b>8. Improper food storage may pose risk to health.</b>                                                                                             |
| <ul style="list-style-type: none"> <li>1. Disagree.</li> <li>2. Don't know/Don't remember</li> <li>3. Agree.</li> </ul>                              |
| <b>9. Preparing food in advance reduces the risk of contamination.</b>                                                                               |
| <ul style="list-style-type: none"> <li>1. Disagree.</li> <li>2. Don't know/Don't remember</li> <li>3. Agree.</li> </ul>                              |
| <b>10. Using non-higienized fresh herbs in the decoration of a portion of broth or soup can contaminate these foods.</b>                             |
| <ul style="list-style-type: none"> <li>1. Disagree.</li> <li>2. Don't know/Don't remember</li> <li>3. Agree.</li> </ul>                              |
| <b>SELF-REPORTED PRACTICES</b>                                                                                                                       |
| <b>1. Do you wash your hands immediately before handling food?</b>                                                                                   |
| <ul style="list-style-type: none"> <li>1. Never</li> <li>2. Rarely</li> <li>3. Sometimes</li> <li>4. Most of the times</li> <li>5. Always</li> </ul> |
| <b>2. Do you use food after the expiration date if it has no change in quality aspect?</b>                                                           |
| <ul style="list-style-type: none"> <li>1. Never</li> <li>2. Rarely</li> <li>3. Sometimes</li> <li>4. Most of the times</li> <li>5. Always</li> </ul> |
| <b>3. Do you thaw food at room temperature (outside the fridge)?</b>                                                                                 |
| <ul style="list-style-type: none"> <li>1. Never</li> <li>2. Rarely</li> <li>3. Sometimes</li> <li>4. Most of the times</li> <li>5. Always</li> </ul> |
| <b>4. Do you check the expiration date of ingredients before using them in food preparation?</b>                                                     |
| <ul style="list-style-type: none"> <li>1. Never</li> <li>2. Rarely</li> <li>3. Sometimes</li> <li>4. Most of the times</li> <li>5. Always</li> </ul> |

**5. Do you wash your hands after using the bathroom?**

- 1. Never
- 2. Rarely
- 3. Sometimes
- 4. Most of the times
- 5. Always

**6. Do you talk while handling ready to eat food?**

- 1. Never
- 2. Rarely
- 3. Sometimes
- 4. Most of the times
- 5. Always

**7. Do you handle food when you are sick or have cuts on hands?**

- 1. Never
- 2. Rarely
- 3. Sometimes
- 4. Most of the times
- 5. Always

**8. Do you wear nail polish or use jewelry when handling food?**

- 1. Never
- 2. Rarely
- 3. Sometimes
- 4. Most of the times
- 5. Always

**9. Do you keep your hair completely covered with a cap while handling food?**

- 1. Never
- 2. Rarely
- 3. Sometimes
- 4. Most of the times
- 5. Always

**10. Do you sanitize your workplace after finishing your service?**

- 1. Never
- 2. Rarely
- 3. Sometimes
- 4. Most of the times
- 5. Always

**Final Score Instructions**

- . For each correct item, assign one point to the final score.
- . For incorrect items or 'do not know/do not remember', 'rarely' 'sometimes' and 'most of the times' answers, do not assign any points to the final score.

**Classification**

|                                                                                                                                                                                                            |  |
|------------------------------------------------------------------------------------------------------------------------------------------------------------------------------------------------------------|--|
| Food truck food handler with scores $\leq 6$ in the knowledge section <b>OR</b> $\leq 5$ in the attitudes section <b>OR</b> $\leq 6$ in the self-reported practices section:<br>high risk of contamination |  |
| Food truck food handler with scores $> 6$ in the knowledge section <b>AND</b> $> 5$ in the attitudes section <b>AND</b> $> 6$ in the self-reported practices section:<br>low risk of contamination         |  |
